# Supplementary material for: Cannabidiol (CBD) and Δ9-tetrahydrocannabinol (THC) for chronic insomnia disorder (‘CANSLEEP’ trial): protocol for a randomised, placebo-controlled, double-blinded, proof-of-concept trial
Source: PubMed Central journal article supplement — BMJ Open. 2020 May 18;10(5):e034421. doi: 10.1136/bmjopen-2019-034421 (PMC7239553; doi:10.1136/bmjopen-2019-034421), 2020-05-18
Supplement: bmjopen-2019-034421supp002.pdf [file bmjopen-2019-034421supp002.pdf]

---

**Supplementary File 2. World Health Organisation Trial Registration Data Set**


---

|                                                      |                                                                                                                                                                                                                                                               |
|------------------------------------------------------|---------------------------------------------------------------------------------------------------------------------------------------------------------------------------------------------------------------------------------------------------------------|
| <b>Primary registry and trial identifying number</b> | Australian and New Zealand Clinical Trials Registry (ANZCTRN12619000714189)                                                                                                                                                                                   |
| <b>Secondary identifying numbers</b>                 | UTN: U1111-1231-0849                                                                                                                                                                                                                                          |
| <b>Date of registration in primary registry</b>      | 13 May, 2019                                                                                                                                                                                                                                                  |
| <b>Source(s) of monetary or material support</b>     | The Lambert Initiative for Cannabinoid Therapeutics, The University of Sydney                                                                                                                                                                                 |
| <b>Primary sponsor</b>                               | The Woolcock Institute of Medical Research<br>431 Glebe Point Road Glebe NSW 2037 Australia                                                                                                                                                                   |
| <b>Contact for public queries</b>                    | Miss Anastasia Suraev (cansleep@woolcock.org.au)                                                                                                                                                                                                              |
| <b>Contact for scientific queries</b>                | Dr Camilla Hoyos (camilla.hoyos@sydney.edu.au)                                                                                                                                                                                                                |
| <b>Public title</b>                                  | A single-dose, double-blind, placebo-controlled, randomised, crossover study of an oral cannabis-based medicine (ETC120) on sleep, cognition, and next-day function in adults with chronic insomnia disorder                                                  |
| <b>Scientific title</b>                              | A single-dose, double-blind, placebo-controlled, randomised, crossover study of an oral cannabis-based medicine (ETC120) on sleep quality and quantity in adults with chronic insomnia disorder                                                               |
| <b>Countries of recruitment</b>                      | Australia                                                                                                                                                                                                                                                     |
| <b>Health condition(s) or problem(s) studied</b>     | Insomnia disorder                                                                                                                                                                                                                                             |
| <b>Intervention(s)</b>                               | <i>Active comparator:</i> oral solution containing 10 mg $\Delta^9$ -tetrahydrocannabinol (THC) and 200 mg cannabidiol (CBD) in medium-chain triglycerides (MCT) oil<br><br><i>Placebo comparator:</i> matching oil solution containing no active ingredients |
| <b>Key inclusion and exclusion criteria</b>          | <i>Ages eligible for study:</i> 35 to 60 years inclusive<br><i>Sexes eligible for study:</i> Both<br><i>Accepts healthy volunteers:</i> No<br><br><i>Inclusion criteria:</i> Adult patient (35 to 60 years) diagnosed with chronic insomnia disorder          |

---

|                                |                                                                                                                                                                                                                                                                                                                                                          |
|--------------------------------|----------------------------------------------------------------------------------------------------------------------------------------------------------------------------------------------------------------------------------------------------------------------------------------------------------------------------------------------------------|
|                                | <i>Exclusion criteria:</i> Shift worker, medical condition or medication that is the cause of the insomnia (including other sleep disorder), use of any modality of treatment for insomnia including CBT in the past 3 months, history of drug and alcohol abuse/dependency, history of major psychiatric disorder except clinically managed depression. |
| <b>Study type</b>              | Interventional<br><i>Allocation:</i> randomized controlled trial. Crossover: double blind (participant, investigator, outcomes assessor)<br><i>Primary purpose:</i> Treatment<br>Phase I/Phase 2                                                                                                                                                         |
| <b>Date of first enrolment</b> | August 2019                                                                                                                                                                                                                                                                                                                                              |
| <b>Target sample size</b>      | 20                                                                                                                                                                                                                                                                                                                                                       |
| <b>Recruitment status</b>      | Recruiting                                                                                                                                                                                                                                                                                                                                               |
| <b>Primary outcome(s)</b>      | Change in total sleep time (TST) and wake after sleep onset (WASO) measured in minutes from in-laboratory overnight PSG                                                                                                                                                                                                                                  |
| <b>Key secondary outcomes</b>  | Sleep microarchitecture metric measured using high-density EEG and source modelling; next-day neurobehavioural functioning (including cognition, alertness and simulated driving performance)                                                                                                                                                            |

---
